# Supplementary material for: Simultaneous determination of glyphosate, glufosinate ammonium and their metabolites in maize and soybean by ultra-performance liquid chromatography with tandem mass spectrometry
Source: Royal Society of Chemistry journal article supplement (doi:10.1039/d2ay01298g), 2022-01-01
Supplement: d2ay01298g1.pdf [file d2ay01298g1.pdf]

1 **Simultaneous Determination of Glyphosate, Glufosinate ammonium and their Metabolites in**  
2 **Maize and Soybean by Ultra-Performance Liquid Chromatography with Tandem Mass**  
3 **Spectrometry**

4  
5 Kuan Wang<sup>a,c</sup>, Yue Geng<sup>b,\*</sup>, Zhe Dong<sup>d</sup>, Xinglu Pan<sup>a</sup>, Xiaohu Wu<sup>a</sup>, Jun Xu<sup>a</sup>, Haixiang Gao<sup>c</sup>,  
6 Fengshou Dong<sup>a,\*</sup>, Yongquan Zheng<sup>a</sup>

7 <sup>a</sup> Institute of Plant Protection, Chinese Academy of Agricultural Sciences, Beijing 100193, China

8 <sup>b</sup> Agro-Environmental Protection Institute, Ministry of Agriculture and Rural Affairs, Tianjin, China

9 <sup>c</sup> College of Science, China Agricultural University, Beijing 100193, China

10 <sup>d</sup> Syngenta Group China, Beijing, China

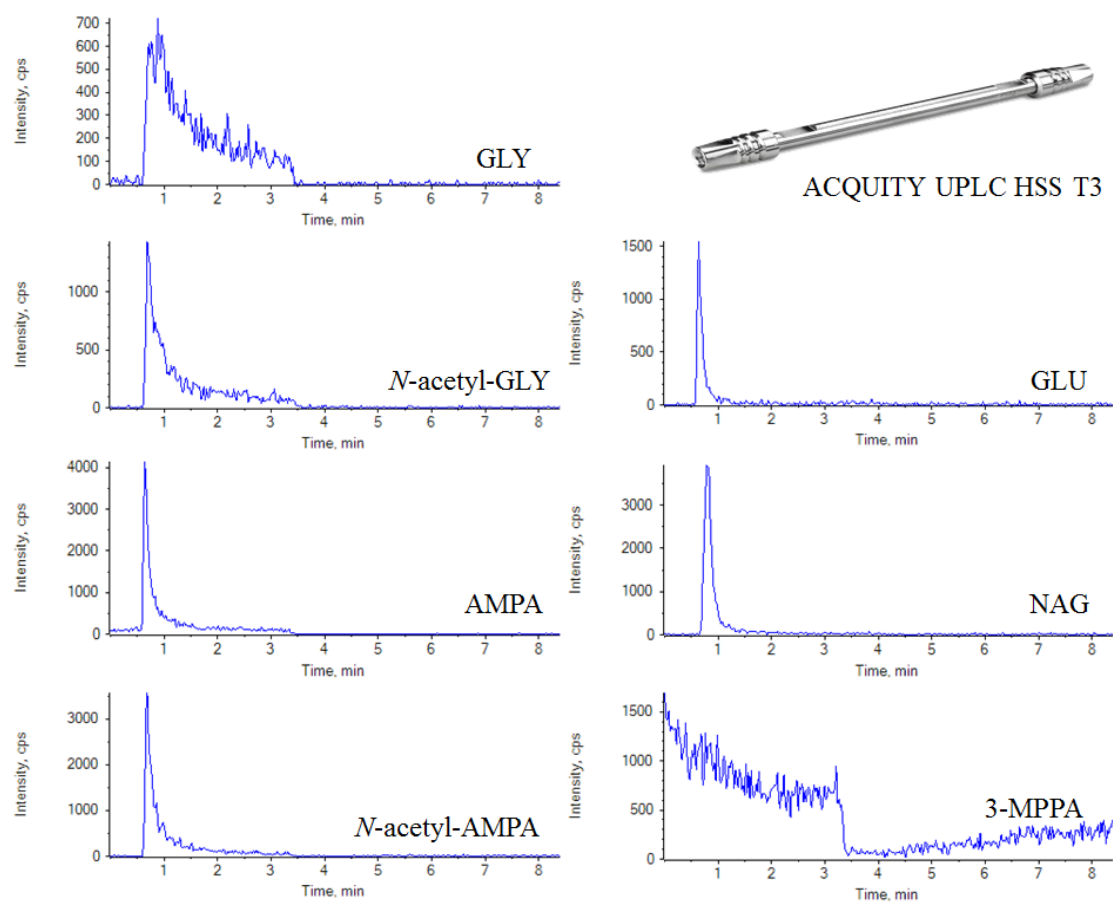

**Figure S1.** Separation of GLY, N-acetyl-GLY, N-acetyl-AMPA, GLY, NAG, and 3-MPPA using HSS T3 column.
